# Supplementary material for: Willingness to Accept the COVID-19 Vaccine and Related Factors among Indian Adults: A Cross-Sectional Study
Source: MDPI journal article supplement (doi:10.3390/vaccines10071095), 2022-07-08
Supplement: s1 [file s1]

## Article

# Supplementary Material: Willingness to Accept the COVID-19 Vaccine and Related Factors among Indian Adults: A Cross-Sectional Study

Ashwaghosha Parthasarathi <sup>1</sup>, Rahul Krishna Puvvada <sup>2</sup>, Malavika Shankar <sup>3</sup>, Jayaraj Biligere Siddaiah <sup>4</sup>, Koustav Ganguly <sup>5</sup>, Swapna Upadhyay <sup>5,\*</sup> and Padukudru Anand Mahesh <sup>4,\*</sup>

<sup>1</sup> Allergy, Asthma and Chest Centre, Krishnamurthypuram, Mysore 570004, Karnataka, India; ashwa.partha@gmail.com

<sup>2</sup> Department of Physiology, Anatomy, and Microbiology, College of Science Health and Engineering, La Trobe University, Melbourne Victoria 3086, Australia; 20173174@students.latrobe.edu.au

<sup>3</sup> Department of Internal Medicine, Interfaith Medical Center, New York, NY 11213, USA; mshankar@interfaithmedical.com

<sup>4</sup> Department of Pulmonology, JSS Medical College, JSS Academy of Higher Education & Research, Mysore 570015, Karnataka, India; bsjayaraj@jssuni.edu.in

<sup>5</sup> Unit of Integrative Toxicology, Institute of Environmental Medicine (IMM), Karolinska Institutet, 17177 Stockholm, Sweden; koustav.ganguly@ki.se

\* Correspondence: swapna.upadhyay@ki.se (S.U.); pamahesh@jssuni.edu.in (P.A.M.)

**Table S1.** STROBE Statement—checklist of items that should be included in reports of observational studies.

|                                    | Item No. | Recommendation                                                                                                                                                                                | Page No. |
|------------------------------------|----------|-----------------------------------------------------------------------------------------------------------------------------------------------------------------------------------------------|----------|
| Title and abstract                 | 1        | (a) Indicate the study's design with a commonly used term in the title or the abstract                                                                                                        | 2        |
|                                    |          | (b) Provide in the abstract an informative and balanced summary of what was done and what was found                                                                                           | 2        |
| Background/rationale<br>Objectives | 2        | Explain the scientific background and rationale for the investigation being reported                                                                                                          | 3–4      |
|                                    | 3        | State specific objectives, including any prespecified hypotheses                                                                                                                              | 4        |
| Study design                       | 4        | Present key elements of study design early in the paper                                                                                                                                       | 4        |
| Setting                            | 5        | Describe the setting, locations, and relevant dates, including periods of recruitment, exposure, follow-up, and data collection                                                               | 4–5      |
|                                    |          | a) <i>Cohort study</i> —Give the eligibility criteria, and the sources and methods of selection of participants. Describe methods of follow-up                                                |          |
| Participants                       |          | b) <i>Case-control study</i> —Give the eligibility criteria, and the sources and methods of case ascertainment and control selection. Give the rationale for the choice of cases and controls | 4–5      |
|                                    | 6        | c) <i>Cross-sectional study</i> —Give the eligibility criteria, and the sources and methods of selection of participants                                                                      |          |
|                                    |          | d) <i>Cohort study</i> —For matched studies, give matching criteria and number of exposed and unexposed                                                                                       |          |
|                                    |          | e) <i>Case-control study</i> —For matched studies, give matching criteria and the number of controls per case                                                                                 | NA       |
| Variables                          | 7        | Clearly define all outcomes, exposures, predictors, potential confounders, and effect modifiers. Give diagnostic criteria, if applicable                                                      | 5–6      |
| Data sources/ measurement          | 8 *      | For each variable of interest, give sources of data and details of methods of assessment (measurement). Describe comparability of assessment methods if there is more than one group          | 6        |
| Bias                               | 9        | Describe any efforts to address potential sources of bias                                                                                                                                     | NA       |
| Study size                         | 10       | Explain how the study size was arrived at                                                                                                                                                     | 4        |

|                        |      |                                                                                                                                                                                                              |       |
|------------------------|------|--------------------------------------------------------------------------------------------------------------------------------------------------------------------------------------------------------------|-------|
| Quantitative variables | 11   | Explain how quantitative variables were handled in the analyses. If applicable, describe which groupings were chosen and why                                                                                 | 6     |
|                        |      | (a) Describe all statistical methods, including those used to control for confounding                                                                                                                        | 6     |
|                        |      | (b) Describe any methods used to examine subgroups and interactions                                                                                                                                          | NA    |
|                        |      | (c) Explain how missing data were addressed                                                                                                                                                                  | 6     |
| Statistical methods    | 12   | (d) <i>Cohort study</i> —If applicable, explain how loss to follow-up was addressed                                                                                                                          |       |
|                        |      | <i>Case-control study</i> —If applicable, explain how matching of cases and controls was addressed                                                                                                           | NA    |
|                        |      | <i>Cross-sectional study</i> —If applicable, describe analytical methods taking account of sampling strategy                                                                                                 |       |
|                        |      | (e) Describe any sensitivity analyses                                                                                                                                                                        | NA    |
| Participants           | 13 * | (a) Report numbers of individuals at each stage of study—eg numbers potentially eligible, examined for eligibility, confirmed eligible, included in the study, completing follow-up, and analysed            | 7     |
|                        |      | (b) Give reasons for non-participation at each stage                                                                                                                                                         | NA    |
|                        |      | (c) Consider use of a flow diagram                                                                                                                                                                           | NA    |
|                        |      | (a) Give characteristics of study participants (eg demographic, clinical, social) and information on exposures and potential confounders                                                                     | 7     |
| Descriptive data       | 14 * | (b) Indicate number of participants with missing data for each variable of interest                                                                                                                          | 7     |
|                        |      | (c) <i>Cohort study</i> —Summarise follow-up time (eg, average and total amount)                                                                                                                             | NA    |
|                        |      | <i>Cohort study</i> —Report numbers of outcome events or summary measures over time                                                                                                                          | NA    |
| Outcome data           | 15 * | <i>Case-control study</i> —Report numbers in each exposure category, or summary measures of exposure                                                                                                         | NA    |
|                        |      | <i>Cross-sectional study</i> —Report numbers of outcome events or summary measures                                                                                                                           | 7–9   |
|                        |      | (a) Give unadjusted estimates and, if applicable, confounder-adjusted estimates and their precision (eg, 95% confidence interval). Make clear which confounders were adjusted for and why they were included | 8–9   |
| Main results           | 16   | (b) Report category boundaries when continuous variables were categorized                                                                                                                                    | 7     |
|                        |      | (c) If relevant, consider translating estimates of relative risk into absolute risk for a meaningful time period                                                                                             | NA    |
| Other analyses         | 17   | Report other analyses done—eg analyses of subgroups and interactions, and sensitivity analyses                                                                                                               | NA    |
| Key results            | 18   | Summarise key results with reference to study objectives                                                                                                                                                     | 10–13 |
| Limitations            | 19   | Discuss limitations of the study, taking into account sources of potential bias or imprecision. Discuss both direction and magnitude of any potential bias                                                   | 13    |
| Interpretation         | 20   | Give a cautious overall interpretation of results considering objectives, limitations, multiplicity of analyses, results from similar studies, and other relevant evidence                                   | 13–14 |
| Generalisability       | 21   | Discuss the generalisability (external validity) of the study results                                                                                                                                        | 13    |
| Funding                | 22   | Give the source of funding and the role of the funders for the present study and, if applicable, for the original study on which the present article is based                                                | 15    |

\*Give information separately for exposed and unexposed groups. NA: Not applicable

**Table S2.** Studies done on the general population of other LMICs testing vaccine acceptance and related factors.

| Author                  | Country    | Sample size (N),<br>Age range or M $\pm$ SD    | Comparison information                        | Intention results                      | Age                                                  | Gender                               | Education                                                       | Income                                                |
|-------------------------|------------|------------------------------------------------|-----------------------------------------------|----------------------------------------|------------------------------------------------------|--------------------------------------|-----------------------------------------------------------------|-------------------------------------------------------|
| M Abedin (2021)[1]      | Bangladesh | 3646,<br><15 to 65 years) /<br>37.4 $\pm$ 13.9 | Vaccine acceptance<br>Vs Refusal Vs Hesitancy | Yes: 74.5%<br>No: 8.5%<br>Unsure: 17%  | Not significant                                      | Not significant                      | Not significant                                                 | -                                                     |
| Acheampong T (2021) [2] | Ghana      | 2345,<br>15 to > 55 years                      | Vaccine acceptance<br>Vs Refusal Vs Hesitancy | Yes: 51%<br>No: 21%<br>Unsure: 28%     | Age above 55 years are more likely to vaccinate      | Males more likely to vaccinate (56%) | Higher educational qualification more likely to vaccinate (59%) | -                                                     |
| Adebisi YA (2021) [3]   | Nigeria    | 517,<br>16 to $\geq$ 61 years                  | Vaccine acceptance<br>Vs Refusal              | Yes: 74.5%<br>No: 24%                  | Adults (16 to 30 years) are more likely to vaccinate | Males more likely to vaccinate       | Higher educational qualification more likely to vaccinate       | -                                                     |
| Ahmed MAM (2021) [4]    | Somalia    | 4543,<br>23.5 $\pm$ 6.4 years                  | Vaccine acceptance<br>Vs Refusal              | Yes: 76.7%<br>No: 23.3%                | Not significant                                      | Females more likely to vaccinate     | Not significant                                                 | Not significant                                       |
| Ahmed TF (2021) [5]     | Pakistan   | 655, 18 to $\geq$ 60 years                     | Vaccine acceptance<br>Vs Refusal Vs Hesitancy | Yes: 62%<br>No: 15.6%<br>Unsure: 22.4% | Age above 50 years are more likely to vaccinate      | Not significant                      | Not significant                                                 | High income participants are willing to take vaccine. |

|                            |             |                                             |                                            |                                          |                                                        |                                           |                                                                      |                                                       |
|----------------------------|-------------|---------------------------------------------|--------------------------------------------|------------------------------------------|--------------------------------------------------------|-------------------------------------------|----------------------------------------------------------------------|-------------------------------------------------------|
| Akiful Haque MM (2021) [6] | Bangladesh  | 7357,<br><30 to > 50 years                  | Vaccine acceptance Vs Refusal Vs Hesitancy | Yes: 65.05%                              | Age above 30 years are more likely to vaccinate        | Not significant                           | Higher educational qualification more likely to vaccinate            | High income participants are willing to take vaccine. |
| WA Al-Qerem (2021)[7]      | Jordan      | 1144,<br>18 to 60 years                     | Vaccine acceptance Vs Refusal Vs Hesitancy | Yes: 36.8%<br>No: 36.8%<br>Unsure: 26.4% | Not significant                                        | Females are unwilling to take vaccine.    | University students are willing to take vaccine.                     | -                                                     |
| AJ Udoakang (2022)[8]      | West Africa | 1106,<br>≤20 to ≥41 years /<br>32.14 ± 8.35 | Vaccine acceptance Vs Refusal Vs Hesitancy | Yes: 75.2%<br>No: 10.4%<br>Unsure: 14.4% | Age above 41 years are willing to take vaccine (85.2%) | Males are willing to take vaccine (75.8%) | Higher educational qualification are willing to take vaccine (77.8%) | -                                                     |
| Arshad MS (2021) [9]       | Pakistan    | 2158,<br>18 to >50 years                    | Vaccine acceptance Vs Refusal Vs Hesitancy | Yes: 48.2%<br>No: 25.8%<br>Unsure: 26%   | -                                                      | -                                         | -                                                                    | -                                                     |
| Bongomin F (2021) [10]     | Uganda      | 317, 51.5 ± 14.1 years                      | Vaccine acceptance Vs Refusal              | Yes: 70.1%<br>No: 29.9%                  | -                                                      | Males are willing to take vaccine         | Not significant                                                      | -                                                     |
| Bono SA (2021) [11]        | Bangladesh  | 230, 18 to ≥60 years<br>28.62 ± 6.53        | Vaccine acceptance Vs Hesitancy            | Yes: 89.57                               | Young people (18–39 years) are willing to take vaccine | Males are willing to take vaccine         | Higher educational qualification are willing to take vaccine         | High income participants are willing to take vaccine  |
|                            | DR Congo    | 219, 18 to ≥60 years,<br>35.20 ± 8.96       | Vaccine acceptance VS hesitancy            | Yes: 59.36                               | Young people (18–39 years)                             | Males are willing to take vaccine         | Higher educational                                                   | High income participants are                          |

|                          |          |                                    |                                            |                                      |                                                        |                                             |                                                                      |                                                         |
|--------------------------|----------|------------------------------------|--------------------------------------------|--------------------------------------|--------------------------------------------------------|---------------------------------------------|----------------------------------------------------------------------|---------------------------------------------------------|
|                          |          |                                    |                                            |                                      | are willing to take vaccine                            |                                             | qualification are willing to take vaccine                            | willing to take vaccine                                 |
|                          | Benin    | 159, 18 to ≥60 years, 28.50±10.24  | Vaccine acceptance VS hesitancy            | Yes: 48.43                           | Young people (18–39 years) are willing to take vaccine | Males are willing to take vaccine           | Higher educational qualification are willing to take vaccine         | High income participants are willing to take vaccine    |
|                          | Uganda   | 107, 18 to ≥60 years, 33.79 ± 8.84 | Vaccine acceptance VS hesitancy            | Yes: 88.79                           | Young people (18–39 years) are willing to take vaccine | Males are willing to take vaccine           | Higher educational qualification are willing to take vaccine         | High income participants are willing to take vaccine    |
|                          | Malawi   | 81, 18 to ≥60 years, 37.80 ± 8.63  | Vaccine acceptance VS hesitancy            | Yes: 61.73                           | Young people (18–39 years) are willing to take vaccine | Males are willing to take vaccine           | Higher educational qualification are willing to take vaccine         | High income participants are willing to take vaccine    |
|                          | Mali     | 55, 18 to ≥60 years, 37.44 ± 8.99  | Vaccine acceptance VS hesitancy            | Yes: 74.55                           | Young people (18–39 years) are willing to take vaccine | Males are willing to take vaccine           | Higher educational qualification are willing to take vaccine         | High income participants are willing to take vaccine    |
| Chaudhary FA (2021) [12] | Pakistan | 410, 18 to > 52 years /            | Vaccine acceptance Vs Refusal              | Yes: 52.7%<br>No: 47.3%              | Adults (18–30yrs) are willing to take vaccine          | Females are willing to take vaccine (60.2%) | Higher educational qualification are willing to take vaccine (51.9%) | Higher income group are willing to take vaccine (30.6%) |
| DCBC Moore (2021) [13]   | Brazil   | 173,178, 18 to ≥ 75 years          | Vaccine acceptance Vs Refusal Vs Hesitancy | Yes: 89.5%<br>No: 2.5%<br>Unsure: 8% | Adults (18–39 years) are willing to                    | Females are willing to take vaccine (91.2%) | Higher educational qualification are                                 | High income groups are willing to take vaccine (90.3%)  |

|                                   |           |                                           |                                                    |                                            | take vaccine<br>(91.3%)                                            |                                                      | willing to take<br>vaccine (90.1%)                                                              |                 |
|-----------------------------------|-----------|-------------------------------------------|----------------------------------------------------|--------------------------------------------|--------------------------------------------------------------------|------------------------------------------------------|-------------------------------------------------------------------------------------------------|-----------------|
| D Damba-<br>darjaa (2021)<br>[14] | Mongolia  | 2875,<br>18 to ≥ 50 years                 | Vaccine acceptance<br>Vs Refusal Vs Hesi-<br>tancy | Yes: 68.3%<br>No: 7.1%<br>Unsure:<br>24.5% | Age above 50<br>years are<br>willing to<br>take vaccine<br>(80.7%) | Females are<br>willing to<br>take vaccine<br>(68.4%) | Higher educa-<br>tional<br>qualification are<br>willing to take<br>vaccine (60%)                | -               |
| Harapan<br>(2020) [15]            | Indonesia | 1359,<br><20 to >51 years                 | Vaccine acceptance<br>Vs Refusal                   | Yes: 93.3%<br>No: 6.7%                     | Not signifi-<br>cant                                               | Females are<br>willing to<br>take vaccine.           | Not significant                                                                                 | Not significant |
| J Amo-Adjei<br>(2022) [16]        | Ghana     | 415,<br><20 to ≥60 years                  | Vaccine acceptance<br>Vs Refusal Vs Hesi-<br>tancy | Yes: 70%<br>No: 20%<br>Unsure:<br>9.9%     | Age above 50<br>years are<br>willing to<br>take vaccine<br>(87.5%) | Females are<br>willing to<br>take vaccine<br>(73.5%) | Higher educa-<br>tional qualifica-<br>tion are willing<br>to take vaccine<br>(73.4%)            | -               |
| LG Shareef<br>(2022) [17]         | Iraq      | 1221,<br>18 to >65 years                  | Vaccine acceptance<br>Vs Refusal                   | Yes: 56.2%<br>No: 43.8%                    | Adults (18–<br>29yrs) are<br>willing to<br>take vaccine            | Males are<br>willing to<br>take vaccine<br>(29%)     | Higher educa-<br>tional qualifica-<br>tion are willing<br>to take vaccine                       | -               |
| LB. Tlale<br>(2022) [18]          | Botswana  | 5300,<br>18 to >65 years                  | Vaccine acceptance<br>Vs Refusal                   | Yes: 73.4%<br>No: 31.3%                    | Not signifi-<br>cant                                               | Males are<br>willing to<br>take vaccine.             | Participants<br>with primary<br>educational<br>qualification are<br>willing to take<br>vaccine. | -               |
| M Bou<br>Hamdan<br>(2021) [19]    | Lebanon   | 800, ≤20 to 40 years<br>/ 21 ± 0.14 years | Vaccine acceptance<br>Vs Refusal Vs Hesi-<br>tancy | Yes: 87%<br>No: 3%                         | Adults (21–30<br>years) are<br>willing to                          | Males are<br>willing to                              | Higher educa-<br>tional<br>qualification are                                                    | -               |

|                                 |            |                           |                                               |                                      |                                                                      |                                                      |                                                                                  |                                                                   |
|---------------------------------|------------|---------------------------|-----------------------------------------------|--------------------------------------|----------------------------------------------------------------------|------------------------------------------------------|----------------------------------------------------------------------------------|-------------------------------------------------------------------|
|                                 |            |                           |                                               | Unsure:<br>10%                       | take vaccine<br>(88%)                                                | take vaccine<br>(88%)                                | willing to take<br>vaccine (88.5%)                                               |                                                                   |
| P Gaur<br>(2021) [20]           | India      | 280,<br>47 ± 13 years     | Vaccine acceptance<br>Vs Refusal              | Yes: 57.5%<br>No: 42.5%              | Age above 45<br>years are<br>willing to<br>take vaccine.             | -                                                    | Graduates are<br>willing to take<br>vaccine (69%)                                | -                                                                 |
| GD Salali<br>(2020) [21]        | Turkey     | 3936                      | Vaccine acceptance<br>Vs Refusal Vs Hesitancy | Yes: 66%<br>No: 3%<br>Unsure:<br>31% | -                                                                    | Males are<br>willing to<br>take vaccine.             | Higher educa-<br>tion unwilling to<br>take vaccine.                              | -                                                                 |
| M Sallam<br>(2020) [22]         | Jordan     | 2173,<br>16 to > 40 years | Vaccine acceptance<br>Vs Refusal              | Yes: 28.4%<br>No: 71.6%              | -                                                                    | Males are<br>willing to<br>take vaccine              | Higher educa-<br>tional<br>qualification are<br>willing to take<br>vaccine       | -                                                                 |
| SAR Syed<br>Alwi (2021)<br>[23] | Malaysia   | 1411,<br>18 to > 60 years | Vaccine acceptance<br>Vs Refusal Vs Hesitancy | Yes: 83.3%<br>Unsure:<br>16.7%       | Adults (18–<br>29years) are<br>willing to<br>take vaccine<br>(88.3%) | Females are<br>willing to<br>take vaccine<br>(83.5%) | Higher educa-<br>tional<br>qualification are<br>willing to take<br>vaccine (83%) | High income<br>groups are will-<br>ing to take vac-<br>cine (81%) |
| Solis Arce<br>(2021) [24]       | Pakistan 1 | 1633                      | Vaccine acceptance<br>Vs Refusal Vs Hesitancy | Yes: 76.12                           | Adults (<25<br>years) are<br>willing to<br>take vaccine              | Males are<br>willing to<br>take vaccine              | Not significant                                                                  | -                                                                 |
|                                 | Pakistan 2 | 1492                      | Vaccine acceptance<br>Vs Refusal Vs Hesitancy | Yes: 66.49                           | Adults (<25<br>years) are<br>willing to<br>take vaccine              | Males are<br>willing to<br>take vaccine              | Not significant                                                                  | -                                                                 |

|                        |                |                        |                                               |                                          |                                                  |                                    |                                      |   |
|------------------------|----------------|------------------------|-----------------------------------------------|------------------------------------------|--------------------------------------------------|------------------------------------|--------------------------------------|---|
|                        | Rwanda         | 1355                   | Vaccine acceptance<br>Vs Refusal Vs Hesitancy | Yes: 84.87                               | Adults (<25 years) are willing to take vaccine   | Males are willing to take vaccine  | Not significant                      | - |
|                        | Sierra Leone 1 | 1070                   | Vaccine acceptance<br>Vs Refusal Vs Hesitancy | Yes: 78.04                               | Adults (<25 years) are willing to take vaccine   | Males are willing to take vaccine  | Not significant                      | - |
|                        | Sierra Leone 2 | 2110                   | Vaccine acceptance<br>Vs Refusal Vs Hesitancy | Yes: 87.91                               | Adults (<25 years) are willing to take vaccine   | Males are willing to take vaccine  | Not significant                      | - |
|                        | Uganda 1       | 3362                   | Vaccine acceptance<br>Vs Refusal Vs Hesitancy | Yes: 85.81                               | Adults (<25 years) are willing to take vaccine   | Males are willing to take vaccine  | Not significant                      | - |
|                        | Uganda 2       | 1366                   | Vaccine acceptance<br>Vs Refusal Vs Hesitancy | Yes: 76.50                               | Adults (<25 years) are willing to take vaccine   | Males are willing to take vaccine  | Not significant                      | - |
| LP Wong (2020) [25]    | Malaysia       | 1159, 18 to > 50 years | Vaccine acceptance<br>Vs Refusal              | Yes: 94.3%<br>No: 5.7%                   | Adults (18–30 years) are willing to take vaccine | Males are willing to take vaccine. | -                                    | - |
| Qunaibi EA (2021) [26] | Algeria        | 2706                   | Vaccine acceptance<br>Vs Refusal Vs Hesitancy | Yes: 3.62%<br>No: 61.9%<br>Unsure: 18.8% | Adults (18–29 years) are willing to take vaccine | Males are willing to take vaccine. | Higher educational qualification are | - |

|            |      |                                            |                                          |                                                  |                                    |                                                                |
|------------|------|--------------------------------------------|------------------------------------------|--------------------------------------------------|------------------------------------|----------------------------------------------------------------|
|            |      |                                            |                                          |                                                  |                                    | willing to take vaccine                                        |
| Egypt      | 5339 | Vaccine acceptance Vs Refusal Vs Hesitancy | Yes: 8%<br>No: 36.5%<br>Unsure: 21.8%    | Adults (18–29 years) are willing to take vaccine | Males are willing to take vaccine. | Higher educational qualification are willing to take vaccine - |
| Mauritania | 99   | Vaccine acceptance Vs Refusal Vs Hesitancy | Yes: 8%<br>No: 39.4%<br>Unsure: 32.3%    | Adults (18–29 years) are willing to take vaccine | Males are willing to take vaccine. | Higher educational qualification are willing to take vaccine - |
| Morocco    | 3775 | Vaccine acceptance Vs Refusal Vs Hesitancy | Yes: 7.9%<br>No: 46.4%<br>Unsure: 25.5%  | Adults (18–29 years) are willing to take vaccine | Males are willing to take vaccine. | Higher educational qualification are willing to take vaccine - |
| Sudan      | 313  | Vaccine acceptance Vs Refusal Vs Hesitancy | Yes: 15.3%<br>No: 43.5%<br>Unsure: 19.2% | Adults (18–29 years) are willing to take vaccine | Males are willing to take vaccine. | Higher educational qualification are willing to take vaccine - |
| Syria      | 1232 | Vaccine acceptance Vs Refusal Vs Hesitancy | Yes: 10.7%<br>No: 43.5%<br>Unsure: 19.2% | Adults (18–29 years) are willing to take vaccine | Males are willing to take vaccine. | Higher educational qualification are willing to take vaccine - |

|         |     |                                               |                                         |                                                  |                                    |                                                              |   |
|---------|-----|-----------------------------------------------|-----------------------------------------|--------------------------------------------------|------------------------------------|--------------------------------------------------------------|---|
| Tunisia | 665 | Vaccine acceptance<br>Vs Refusal Vs Hesitancy | Yes: 6.5%<br>No: 53.8%<br>Unsure: 18%   | Adults (18–29 years) are willing to take vaccine | Males are willing to take vaccine. | Higher educational qualification are willing to take vaccine | - |
| Yemen   | 226 | Vaccine acceptance<br>Vs Refusal Vs Hesitancy | Yes: 9.3%<br>No: 54.4%<br>Unsure: 14.6% | Adults (18–29 years) are willing to take vaccine | Males are willing to take vaccine. | Higher educational qualification are willing to take vaccine | - |

## References:

1. Abedin, M.; Islam, M.A.; Rahman, F.N.; Reza, H.M.; Hossain, M.Z.; Hossain, M.A.; Arefin, A.; Hossain, A. Willingness to vaccinate against COVID-19 among Bangladeshi adults: Understanding the strategies to optimize vaccination coverage. *PLoS One* **2021**, *16*(4): e0250495. <https://doi.org/10.1371/journal.pone.0250495>
2. Acheampong, T.; Akorsikumah, E.A.; Osae-Kwapong, J.; Khalid, M.; Appiah, A.; Amuasi, J.H. Examining Vaccine Hesitancy in Sub-Saharan Africa: A Survey of the Knowledge and Attitudes among Adults to Receive COVID-19 Vaccines in Ghana. *Vaccines* **2021**, *9*, 814, doi:10.3390/vaccines9080814.
3. Adebisi, Y.A.; Alaran, A.J.; Bolarinwa, O.A.; Akande-Sholabi, W.; Lucero-Prisno, D.E. When it is available, will we take it? Social media users' perception of hypothetical COVID-19 vaccine in Nigeria. *Pan Afr Med J* **2021**, *38*, 230–230, doi:10.11604/pamj.2021.38.230.27325.
4. Ahmed, M.A.M.; Colebunders, R.; Gele, A.A.; Farah, A.A.; Osman, S.; Guled, I.A.; Abdullahi, A.A.; Hussein, A.M.; Ali, A.M.; Siewe Fodjo, J.N. COVID-19 Vaccine Acceptability and Adherence to Preventive Measures in Somalia: Results of an Online Survey. *Vaccines* **2021**, *9*, doi:10.3390/vaccines9060543.
5. Ahmed, T.F.; Ahmed, A.; Ahmed, S.; Ahmed, H.U. Understanding COVID-19 vaccine acceptance in Pakistan: an echo of previous immunizations or prospect of change? *Expert Rev. of Vaccines* **2021**, *20*, 1185–1193, doi:10.1080/14760584.2021.1964963.
6. Akiful Haque, M.M.; Rahman, M.L.; Hossian, M.; Matin, K.F.; Nabi, M.H.; Saha, S.; Hasan, M.; Manna, R.M.; Barsha, S.Y.; Hasan, S.M.R., et al. Acceptance of COVID-19 vaccine and its determinants: evidence from a large sample study in Bangladesh. *Heliyon* **2021**, *7*, e07376–e07376, doi:10.1016/j.heliyon.2021.e07376.
7. Al-Qerem, W.A.; Jarab, A.S. COVID-19 Vaccination Acceptance and Its Associated Factors Among a Middle Eastern Population. *Front Public Health* **2021**, *9*, 632914–632914, doi:10.3389/fpubh.2021.632914.
8. Udoakang, A.J.; Djomkam Zune, A.L.; Tapela, K.; Owoicho, O.; Fagbohun, I.K.; Anyigba, C.A.; Lowe, M.; Nganyewo, N.N.; Keneme, B.; Olisaka, F.N., et al. Knowledge, attitude and perception of West Africans towards COVID-19: a survey to inform public health intervention. *BMC Public Health* **2022**, *22*, 445, doi:10.1186/s12889-022-12814-9.
9. Arshad, M.S.; Hussain, I.; Mahmood, T.; Hayat, K.; Majeed, A.; Imran, I.; Saeed, H.; Iqbal, M.O.; Uzair, M.; Rehman, A.U., et al. A National Survey to Assess the COVID-19 Vaccine-Related Conspiracy Beliefs, Acceptability, Preference, and Willingness to Pay among the General Population of Pakistan. *Vaccines* **2021**, *9*, 720, doi:10.3390/vaccines9070720.
10. Bongomin, F.; Olum, R.; Andia-Biraro, I.; Nakwagala, F.N.; Hassan, K.H.; Nassozi, D.R.; Kaddumukasa, M.; Byakika-Kibwika, P.; Kiguli, S.; Kirenga, B.J. COVID-19 vaccine acceptance among high-risk populations in Uganda. *Therapeutic Advances in Infectious Disease* **2021**, *8*, 20499361211024376, doi:10.1177/20499361211024376.
11. Bono, S.A.; Faria de Moura Villela, E.; Siau, C.S.; Chen, W.S.; Pengpid, S.; Hasan, M.T.; Sessou, P.; Ditekemena, J.D.; Amodan, B.O.; Hosseinipour, M.C., et al. Factors Affecting COVID-19 Vaccine Acceptance: An International Survey among Low- and Middle-Income Countries. *Vaccines (Basel)* **2021**, *9*, doi:10.3390/vaccines9050515.
12. Chaudhary, F.A.; Ahmad, B.; Khalid, M.D.; Fazal, A.; Javaid, M.M.; Butt, D.Q. Factors influencing COVID-19 vaccine hesitancy and acceptance among the Pakistani population. *Human Vaccines Immunotherapeutics* **2021**, *17*, 3365–3370, doi:10.1080/21645515.2021.1944743.
13. Moore, D.C.B.C.; Nehab, M.F.; Camacho, K.G.; Reis, A.T.; Junqueira-Marinho, M.d.F.; Abramov, D.M.; Azevedo, Z.M.A.d.; Menezes, L.A.d.; Salú, M.d.S.; Figueiredo, C.E.d.S., et al. Low COVID-19 vaccine hesitancy in Brazil. *Vaccine* **2021**, *39*, 6262–6268, doi:https://doi.org/10.1016/j.vaccine.2021.09.013.
14. Dambadarjaa, D.; Altankhuyag, G.-E.; Chandaga, U.; Khuyag, S.-O.; Batkhorol, B.; Khaidav, N.; Dulamsuren, O.; Gombodorj, N.; Dorjsuren, A.; Singh, P., et al. Factors Associated with COVID-19 Vaccine Hesitancy in Mongolia: A Web-Based Cross-Sectional Survey. *Int. J. of Environ. Res. Public Health* **2021**, *18*, doi:10.3390/ijerph182412903.

15. Harapan, H.; Wagner, A.L.; Yufika, A.; Winardi, W.; Anwar, S.; Gan, A.K.; Setiawan, A.M.; Rajamoorthy, Y.; Sofyan, H.; Mudatsir, M. Acceptance of a COVID-19 Vaccine in Southeast Asia: A Cross-Sectional Study in Indonesia. *Front Public Health* **2020**, *8*, 381–381, doi:10.3389/fpubh.2020.00381.
16. Amo-Adjei, J.; Nurzhynska, A.; Essuman, R.; Lohiniva, A.-L. Trust and willingness towards COVID-19 vaccine uptake: a mixed-method study in Ghana, 2021. *Archives of Public Health* **2022**, *80*, 64, doi:10.1186/s13690-022-00827-0.
17. Shareef, L.G.; Fawzi Al-Hussainy, A.; Majeed Hameed, S. COVID-19 vaccination hesitancy among Iraqi general population between beliefs and barriers: An observational study. *F1000Res* **2022**, *11*, 334, doi:10.12688/f1000research.110545.2.
18. Tlale, L.B.; Gabaitiri, L.; Totolo, L.K.; Smith, G.; Puswane-Katse, O.; Ramonna, E.; Mothowaeng, B.; Tlhakanelo, J.; Masupe, T.; Rankgoane-Pono, G., et al. Acceptance rate and risk perception towards the COVID-19 vaccine in Botswana. *PLoS One* **2022**, *17*, e0263375, doi:10.1371/journal.pone.0263375.
19. Bou Hamdan, M.; Singh, S.; Polavarapu, M.; Jordan, T.R.; Melhem, N.M. COVID-19 vaccine hesitancy among university students in Lebanon. *Epidemiol. Infect* **2021**, *149*, e242, doi:10.1017/S0950268821002314.
20. Gaur, P.; Agrawat, H.; Shukla, A. COVID-19 vaccine hesitancy in patients with systemic autoimmune rheumatic disease: an interview-based survey. *Rheumatol Int* **2021**, *41*, 1601–1605, doi:10.1007/s00296-021-04938-9.
21. Salali, G.D.; Uysal, M.S. COVID-19 vaccine hesitancy is associated with beliefs on the origin of the novel coronavirus in the UK and Turkey. *Psychol. Med.* **2020**, 10.1017/S0033291720004067, 1–3, doi:10.1017/S0033291720004067.
22. Sallam, M.; Dababseh, D.; Eid, H.; Al-Mahzoum, K.; Al-Haidar, A.; Taim, D.; Yaseen, A.; Ababneh, N.A.; Bakri, F.G.; Mahafzah, A. High Rates of COVID-19 Vaccine Hesitancy and Its Association with Conspiracy Beliefs: A Study in Jordan and Kuwait among Other Arab Countries. *Vaccines* **2021**, *9*, 42, doi:10.3390/vaccines9010042.
23. Syed Alwi, S.A.R.; Rafidah, E.; Zurraini, A.; Juslina, O.; Brohi, I.B.; Lukas, S. A survey on COVID-19 vaccine acceptance and concern among Malaysians. *BMC Public Health* **2021**, *21*, 1129, doi:10.1186/s12889-021-11071-6.
24. Solís Arce, J.S.; Warren, S.S.; Meriggi, N.F.; Scacco, A.; McMurry, N.; Voors, M.; Syunyaev, G.; Malik, A.A.; Aboutajdine, S.; Adejo, O., et al. COVID-19 vaccine acceptance and hesitancy in low- and middle-income countries. *Nature Medicine* **2021**, *27*, 1385–1394, doi:10.1038/s41591-021-01454-y.
25. Wong, L.P.; Alias, H.; Wong, P.-F.; Lee, H.Y.; AbuBakar, S. The use of the health belief model to assess predictors of intent to receive the COVID-19 vaccine and willingness to pay. *Hum. vaccines Immunother.* **2020**, *16*, 2204–2214, doi:10.1080/21645515.2020.1790279.
26. Qunaibi, E.A.; Helmy, M.; Basheti, I.; Sultan, I. A high rate of COVID-19 vaccine hesitancy in a large-scale survey on Arabs. *Elife* **2021**, *10*, e68038, doi:10.7554/eLife.68038.
